# Supplementary material for: An array of individually addressable micro-needles for mapping pH distributions
Source: Royal Society of Chemistry journal article supplement (doi:10.1039/c6an00639f), 2016-01-01
Supplement: c6an00639f1.pdf [file c6an00639f1.pdf]

## Supporting Information

### **An Array of Individually Addressable Micro-needles for Mapping pH Distributions**

Claudio Zuliani<sup>\*†</sup>, Fu Siong Ng<sup>‡</sup>, Andrea Alenda <sup>†</sup>, Amir Eftekhari<sup>†</sup>, Nicholas S. Peters<sup>‡</sup>,  
Christofer Toumazou<sup>†</sup>

<sup>†</sup>Centre for Bioinspired Technology, Electrical and Electronic Engineering Department,  
Imperial College London, South Kensington, London, UK

<sup>‡</sup> National Heart & Lung Institute, Imperial College London, London, UK

<sup>\*</sup>Corresponding Author. Claudio Zuliani, email: [c.zuliani@imperial.ac.uk](mailto:c.zuliani@imperial.ac.uk)

**FIGURE S1**

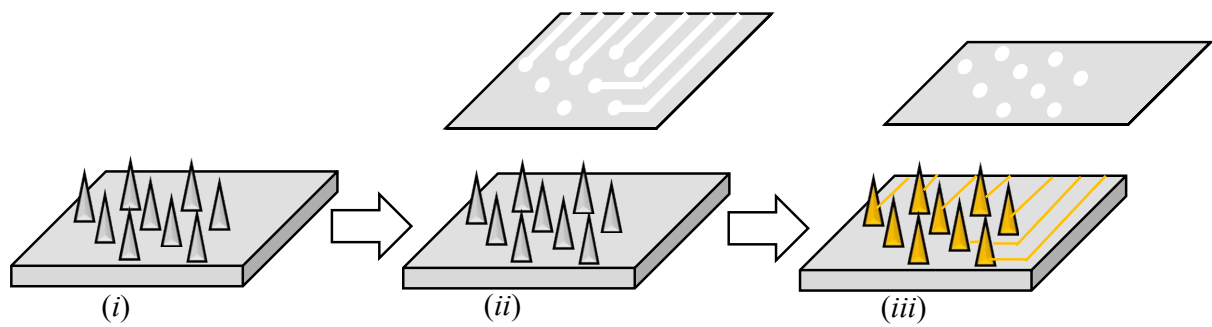

**Figure S1.** Stepwise procedure for gold patterning onto the surface of the (i) microneedles substrate. (ii) A 500  $\mu\text{m}$  Mylar<sup>®</sup> stencil was laser micro-machined to provide apertures in correspondence of the needles and conductive tracks. The stencil was positioned on top of the substrate which was then gold coated using a sputter coater. (iii) The stencil was lifted and a Mylar<sup>®</sup> sheet laminated together with a double adhesive was laid onto the coated surface thus to leave needles and conductive pads exposed. Dimensions of the sketch are not in scale.

**FIGURE S2**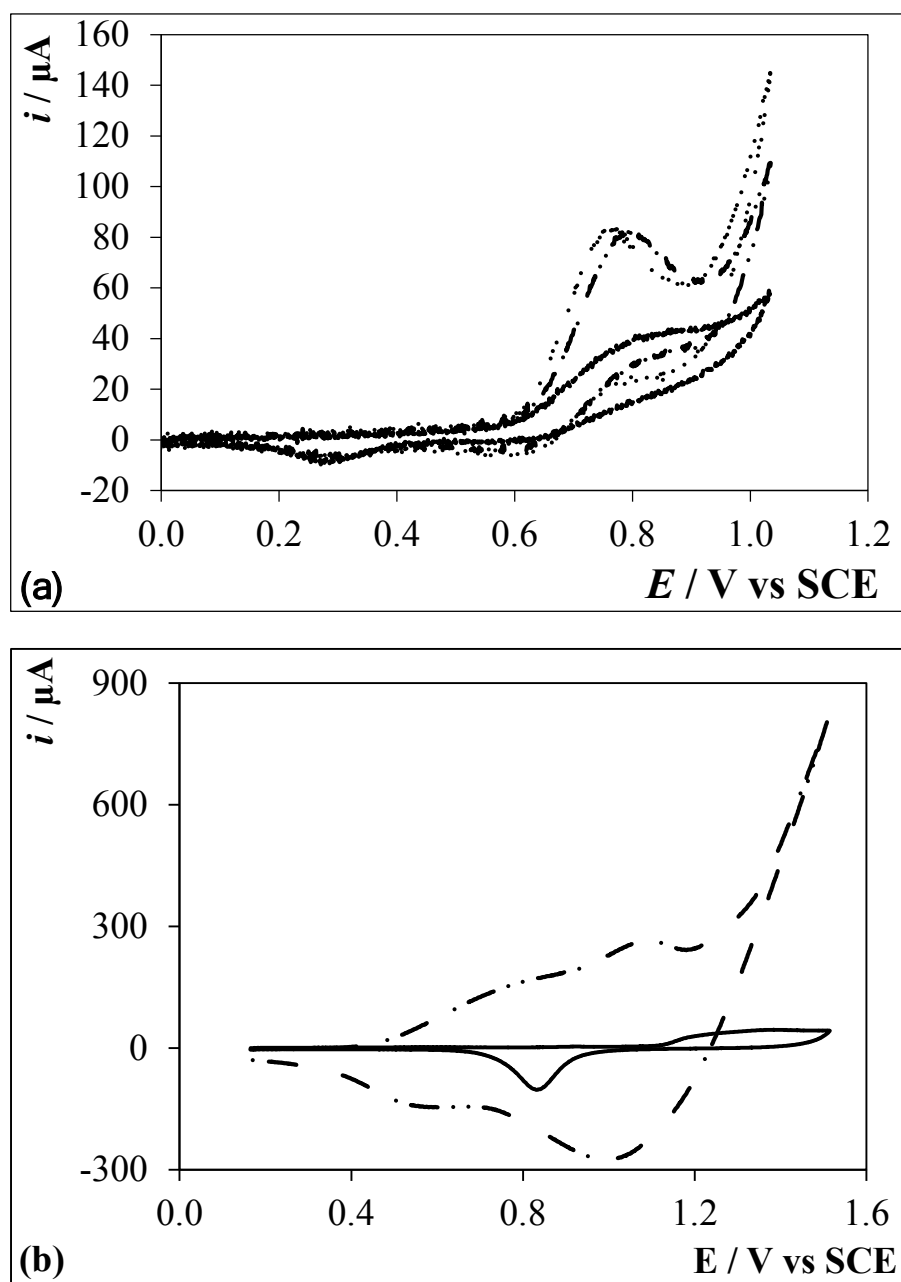

**Figure S2.** (a) Voltammograms obtained during the (—) 1<sup>st</sup>, (— · · —) 2<sup>nd</sup> (· · ·) and 3<sup>rd</sup> scans of an Au-coated needle immersed in the IrOx plating solution. The peak current increases during these scans, *i.e.*, 41, 78 and 83  $\mu\text{A}$ , respectively and the peak potential shifts negatively with the scans,  $\sim 0.83$ ,  $0.79$  and  $0.76$  V, respectively. Scan rate was  $50 \text{ mVs}^{-1}$  and a Pt coiled wire was used as counter electrode. (b) Cyclic voltammograms of (—) Au-coated and (— · · —) IrOx-coated needles immersed in a  $0.5 \text{ M H}_2\text{SO}_4$  solution. The voltammograms of the former contains two distinctive redox couples which have been ascribed to  $\text{IrO}_2/\text{Ir}_2\text{O}_3$  ( $E^0 \sim 0.65 \text{ V}$ ) and to higher valent oxide ( $E^0 \sim 1.05 \text{ V}$ ) transitions.

**FIGURE S3**

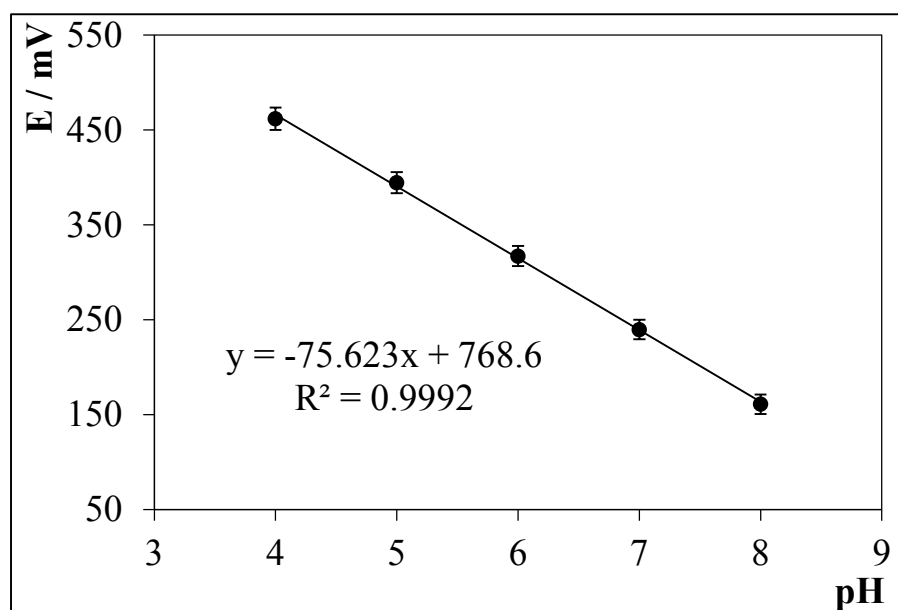

**Figure S3.** Calibration plot of an array of microneedles which were coated by IrOx deposited by applying a potential of 0.935 V for 600 s.  $\Delta E$  values between the sensor and a double junction Ag/AgCl reference electrode were measured with the electrodes dipped in buffer solutions of pH 4, 5, 6, 7 and 8 during 3 minutes. Each point in the plot represents the  $\Delta E$  obtained by averaging the values of the potential bias of the individual needles (n=7). Error bars in the graph represent the standard deviation.



**Table S-2.** Individual values of slope and offset as calculated from the linear regression carried out from the calibration of two microneedles array substrate. Each substrate consists of 7 IrOx-coated individually addressable needles. IrOx was deposited from the plating solution by applying a potential equal to 0.935 V vs SCE. The parameter  $t$  stands for time, i.e., days from the electrodeposition of the IrOx coating.

| $t$ | Array C ( $E=0.935V$ ) |       |       |       |       |       |       | Array D ( $E=0.935V$ ) |       |       |       |       |       |       |                |
|-----|------------------------|-------|-------|-------|-------|-------|-------|------------------------|-------|-------|-------|-------|-------|-------|----------------|
|     | N1                     | N2    | N3    | N4    | N5    | N6    | N7    | N1                     | N2    | N3    | N4    | N5    | N6    | N7    |                |
| 1   | 75.3                   | 75.5  | 75.5  | 76.6  | 75.3  | 76.4  | 74.7  | 74.1                   | 73.3  | 74.6  | 74.2  | 73.4  | 73.7  | 73.7  | Slope          |
| 3   | 68.4                   | 67.8  | 68.3  | 68.5  | 69.9  | 67.6  | 66.1  | 67.9                   | 67.6  | 67.6  | 66.5  | 67.1  | 66.7  | 67.2  |                |
| 5   | 66.2                   | 64.5  | 65.0  | 64.1  | 66.6  | 65.8  | 65.3  | 66.1                   | 66.0  | 65.3  | 65.3  | 65.1  | 65.8  | 65.9  |                |
| 1   | 767.5                  | 756.1 | 778.4 | 776.8 | 774.2 | 781.9 | 745.4 | 727.8                  | 718.7 | 743.8 | 733.1 | 721.8 | 738.7 | 732.5 | Offset         |
| 3   | 599.4                  | 591.0 | 611.4 | 603.8 | 632.9 | 610.0 | 590.7 | 580.7                  | 572.4 | 570.3 | 559.8 | 569.4 | 570.0 | 576.1 |                |
| 5   | 544.0                  | 517.4 | 527.3 | 524.6 | 546.8 | 542.5 | 552.6 | 549.1                  | 543.5 | 533.3 | 535.6 | 540.8 | 541.0 | 550.9 |                |
| 1   | 0.999                  | 0.999 | 0.999 | 0.999 | 1.000 | 0.999 | 0.999 | 0.999                  | 0.999 | 0.999 | 0.999 | 0.999 | 0.999 | 0.999 | R <sup>2</sup> |
| 3   | 0.999                  | 0.999 | 0.999 | 0.999 | 1.000 | 0.999 | 0.999 | 0.999                  | 0.999 | 0.999 | 0.999 | 0.999 | 1.000 | 0.999 |                |
| 5   | 0.999                  | 0.999 | 1.000 | 1.000 | 1.000 | 1.000 | 1.000 | 0.999                  | 0.999 | 1.000 | 0.999 | 0.999 | 0.999 | 1.000 |                |

**Table S-3.** Individual values of slope and offset as calculated from the linear regression carried out from the calibration of two microneedles array substrate. Each substrate consists of 7 IrOx-coated individually addressable needles. IrOx was deposited from the plating solution by applying a potential equal to 1.035 V vs SCE. The parameter  $t$  stands for time, i.e., days from the electrodeposition of the IrOx coating.

| $t$ | Array E ( $E=1.035V$ ) |       |       |       |       |       |       | Array F ( $E=1.035V$ ) |       |       |       |       |       |       |                |
|-----|------------------------|-------|-------|-------|-------|-------|-------|------------------------|-------|-------|-------|-------|-------|-------|----------------|
|     | N1                     | N2    | N3    | N4    | N5    | N6    | N7    | N1                     | N2    | N3    | N4    | N5    | N6    | N7    |                |
| 1   | 72.8                   | 71.5  | 71.5  | 71.8  | 69.0  | 72.3  | 72.6  | 70.8                   | 70.5  | 70.0  | 70.8  | 66.9  | 71.5  | 74.7  | Slope          |
| 3   | 67.2                   | 69.6  | 67.5  | 68.9  | 68.4  | 68.6  | 50.4  | 63.4                   | 66.5  | 66.9  | 62.4  | 65.1  | 66.5  | 68.4  |                |
| 5   | 64.4                   | 52.8  | 64.8  | 65.4  | 66.7  | 65.9  | 50.0  | 62.0                   | 65.5  | 64.5  | 61.8  | 63.6  | 64.1  | 65.9  |                |
| 1   | 699.6                  | 697.0 | 686.6 | 686.0 | 661.7 | 691.2 | 711.4 | 705.4                  | 708.4 | 713.4 | 723.0 | 696.6 | 727.2 | 748.2 | Offset         |
| 3   | 600.6                  | 653.1 | 613.0 | 638.7 | 605.3 | 637.0 | 497.3 | 521.5                  | 569.1 | 574.8 | 603.3 | 577.7 | 601.0 | 600.8 |                |
| 5   | 567.8                  | 489.8 | 568.8 | 548.9 | 572.8 | 57.3  | 488.8 | 518.5                  | 541.3 | 543.4 | 526.5 | 534.0 | 540.8 | 552.6 |                |
| 1   | 0.998                  | 0.997 | 0.998 | 0.997 | 0.998 | 0.998 | 0.998 | 0.998                  | 0.997 | 0.996 | 0.996 | 0.997 | 0.997 | 0.999 | R <sup>2</sup> |
| 3   | 0.999                  | 0.999 | 0.999 | 0.999 | 1.000 | 0.999 | 0.998 | 0.999                  | 0.999 | 0.999 | 0.999 | 0.998 | 0.997 | 0.999 |                |
| 5   | 1.000                  | 0.998 | 1.000 | 0.999 | 1.000 | 1.000 | 0.998 | 0.998                  | 1.000 | 1.000 | 0.997 | 0.999 | 1.000 | 1.000 |                |

FIGURE S4

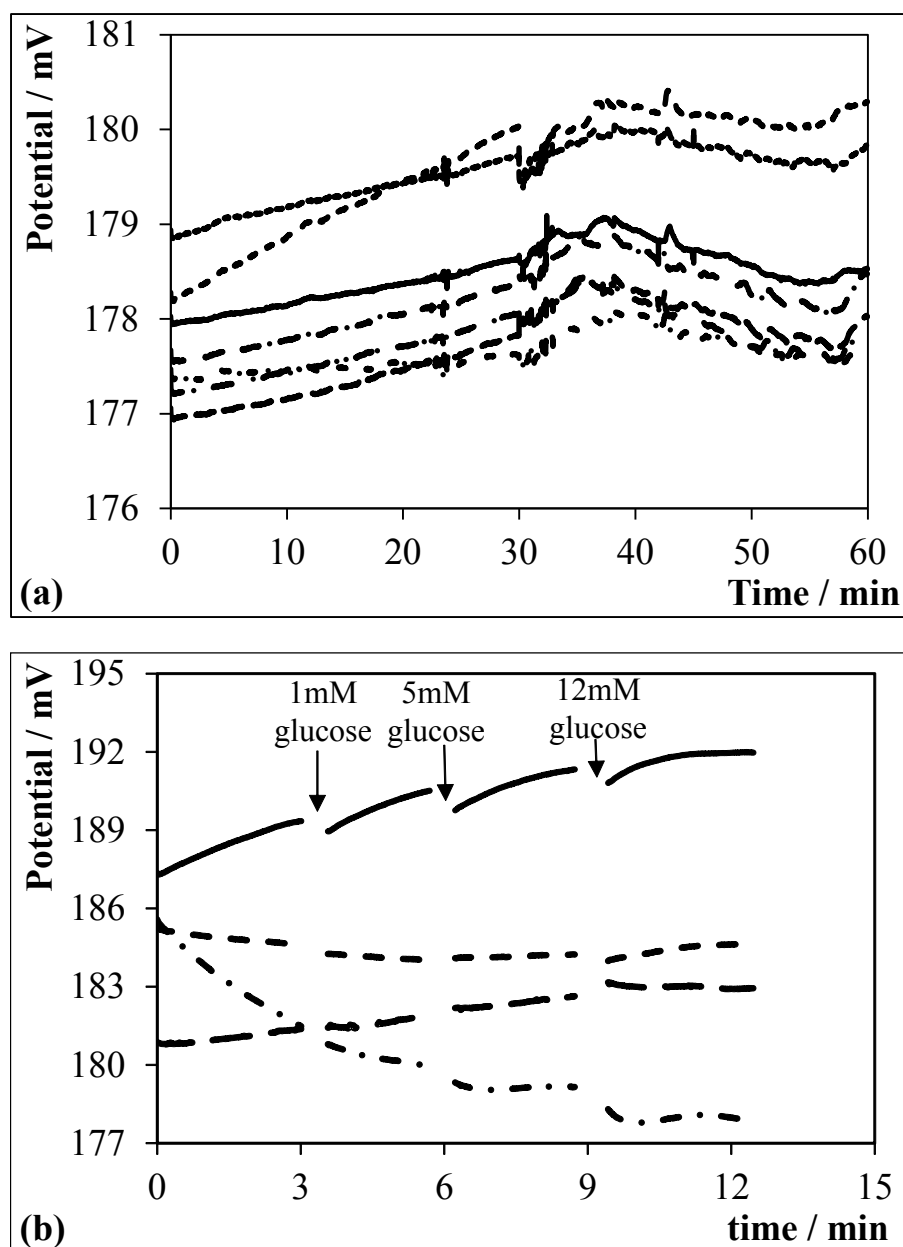

**Figure S4.** Each line corresponds to the potentiometric trace of IrO<sub>x</sub>-coated needles which were immersed in a phosphate buffer (pH=6.80 ± 0.05) containing 0.1 M KNO<sub>3</sub>. (a) After 30 minutes immersion the solution was replaced with an identical one which was saturated with N<sub>2</sub>. (b) The buffer was spiked with 0.96 M aqueous glucose solution at the time indicated by the arrows to obtain a concentration equal to the ones reported in the graph.

**FIGURE S5**

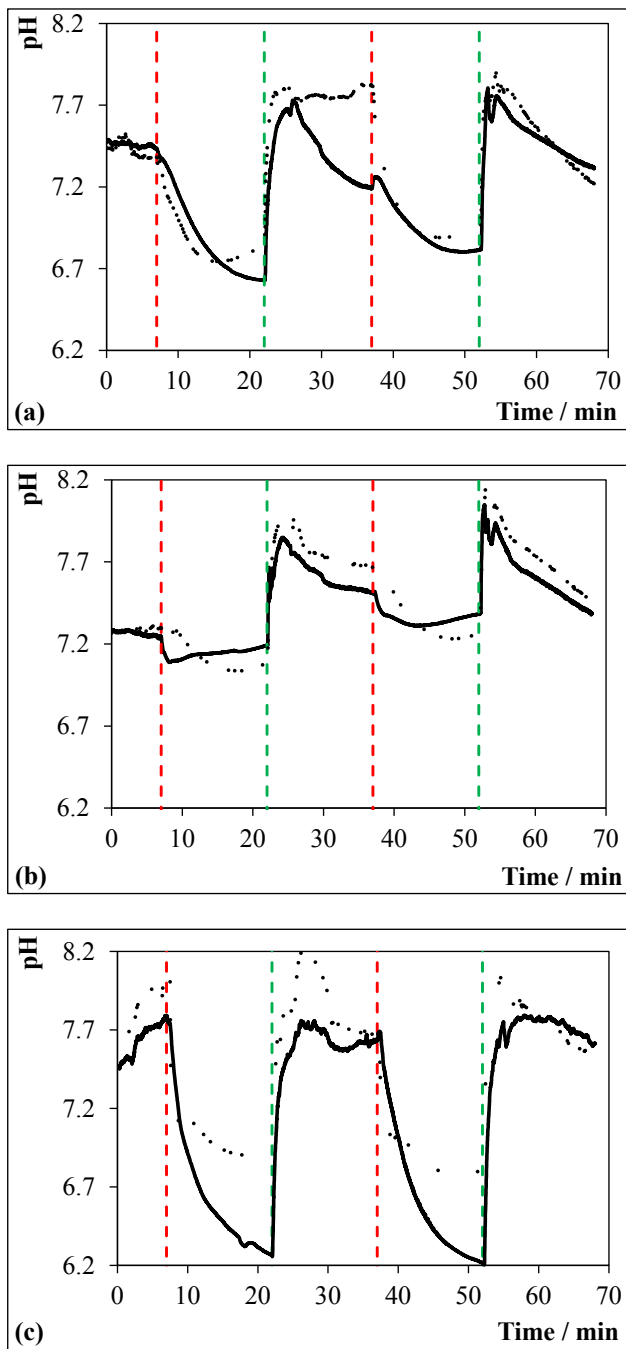

**Figure S5.** Traces of pH as measured by the microneedles (a) N3 (—) and N7 (···) belonging to group *i*, (b) N1 (—) and N2 (···), group *ii* and (c) N5 (—) and N4 (···), group *iii*. Microneedles were inserted into an explanted heart and after 8 minutes background recording, the rat heart underwent two cycles of global heart ischemia/reperfusion. Ischemia occurred at  $t=8$  min and 38 min while reperfusion was started at  $t=22$  min and 52 min as indicated by the red and green dashed vertical lines, respectively.
